# Supplementary material for: Genetic Diversity and Association of EST-SSR and SCoT Markers with Rust Traits in Orchardgrass (Dactylis glomerata L.)
Source: PubMed Central journal article supplement (PMC6273750; doi:10.3390/molecules21010066), 2016-01-08
Supplement: molecules-21-00066-s001.pdf [file molecules-21-00066-s001.pdf]

# Supplementary Materials: Genetic Diversity and Association of EST-SSR and SCoT Markers with Rust Traits in Orchardgrass (*Dactylis glomerata* L.)

Haidong Yan, Yu Zhang, Bing Zeng, Guohua Yin, Xinquan Zhang, Yang Ji, Linkai Huang, Xiaomei Jiang, Xinchun Liu, Yan Peng, Xiao Ma and Yanhong Yan

**Table S1.** The primer information for EST-SSR primers in orchardgrass.

| Forward Primer Sequence |                       | Reverse Primer Sequence |                        |
|-------------------------|-----------------------|-------------------------|------------------------|
| H37-cn135F              | AAGTGAGCACAACGACACGA  | H38-cn135R              | CGATCCAAAGAAGCAAAGATG  |
| H39-cn137F              | CTGCCTCGCGTGAAAGATA   | H40-cn137R              | CCTCCTCGATCTGGATGGT    |
| H41-cn139F              | TACCTGTGCGGCGATGAAT   | H42-cn139R              | CAGGAGCAGGAGAACGTGAA   |
| H47-cn151F              | CTAGGGTTTCCACCTCTCA   | H48-cn151R              | AATGTCCTTGGCGTTGCT     |
| H49-cn153F              | CGCAGCAAGTAGGGTTAGGA  | H50-cn153R              | CCTCGTGGTGGATCTGCAT    |
| H53-cn161F              | CACGAGTGCAGAGCTAGACG  | H54-cn161R              | ACAACAACCCGACTGCTACC   |
| H55-cn174F              | GGCTCGAGCTTAAACCCTA   | H56-cn174R              | CTCCATCCATTCTTGCCATCT  |
| H59-cn1100F             | CGTCGTCCTCTGCTGTGAG   | H60-cn1100R             | AGGTCGTCCATCTGCTGCT    |
| H61-cn1101F             | GCGGAGGAGAGAAAGCAAT   | H62-cn1101R             | AGGTCGTCCATCTGCTGCT    |
| H63-cn1107F             | CCACCAGCTTCCTTCTCTTG  | H64-cn1107R             | CCCTCAACAAATCGAACTCC   |
| H67-cn1115F             | CGAGAAGAAGGTGGTGTCTG  | H68-cn1115R             | AGGTCGTGGAAGGTCTTGG    |
| H69--cn1119F            | ATCGTCTCCTCCTCCTCCA   | H70-cn1119R             | ATGCCTCGGTGGACTGGTA    |
| H71--cn1130F            | AAATGTTGAGCAACGGGAGCT | H72-cn1130R             | ACTTCATAGGGCGGAGGTCT   |
| H75-cn1144F             | AGAAGGCGGCTCAGAAGAAG  | H76-cn1144R             | GCTCCAACCTCAGAATCAACAA |
| H77-cn1147F             | GGCTAGGGTTTCGACTCCTC  | H78-cn1147R             | AGATGGCGAACTCGACCTG    |
| H79-cn1152F             | ACAAAGGCTCACCGTGGAA   | H80-cn1152R             | GTCGGAGGCGATGAACTCT    |
| H81-cn1156F             | CTCCCTCACCTCAAGCAGT   | H82-cn1156R             | GACAGCAGCACACCGAGTT    |
| H83-cn1158F             | CTCATCCACCACCACCAC    | H84-cn1158R             | CCCTGAAGAAGTCGAACACG   |

**Table S2.** The band information of EST-SSRs in orchardgrass.

| Primer Pairs | Total Number | Number of         | Percentage of         |
|--------------|--------------|-------------------|-----------------------|
| Bands        | of Bands     | Polymorphic Bands | Polymorphic Bands (%) |
| H037.038     | 12           | 11                | 91.67                 |
| H039.040     | 10           | 10                | 100.00                |
| H041.042     | 8            | 7                 | 87.50                 |
| H047.048     | 8            | 7                 | 87.50                 |
| H049.050     | 6            | 5                 | 83.33                 |
| H053.054     | 7            | 7                 | 100.00                |
| H055.056     | 6            | 6                 | 100.00                |
| H059.060     | 9            | 8                 | 88.89                 |
| H061.062     | 7            | 6                 | 85.71                 |
| H063.064     | 11           | 11                | 100.00                |
| H067.068     | 11           | 9                 | 81.81                 |
| H069.070     | 14           | 12                | 85.71                 |
| H071.072     | 9            | 9                 | 88.89                 |
| H075.076     | 8            | 7                 | 87.50                 |
| H077.078     | 10           | 10                | 100.00                |
| H079.080     | 10           | 9                 | 90.00                 |
| H081.082     | 11           | 9                 | 81.81                 |
| H083.084     | 7            | 5                 | 71.43                 |
| Total        | 164          | 148               | 90.24                 |

**Table S3.** The information about SCoT primers in orchardgrass.

| Primer Name | Sequences(5'-3')   |
|-------------|--------------------|
| SCoT1       | CAACAATGGCTACCACCA |
| SCoT2       | CAACAATGGCTACCACCC |
| SCoT5       | CAACAATGGCTACCACGA |
| SCoT6       | CAACAATGGCTACCACGC |
| SCoT8       | CAACAATGGCTACCACGT |
| SCoT10      | CAACAATGGCTACCAGCC |
| SCoT14      | ACGACATGGCGACCACGC |
| SCoT16      | ACCATGGCTACCACCGAC |
| SCoT25      | ACCATGGCTACCACCGGG |
| SCoT26      | ACCATGGCTACCACCGTC |
| SCoT27      | ACCATGGCTACCACCGTG |
| SCoT34      | ACCATGGCTACCACCGCA |
| SCoT35      | CATGGCTACCACCGGCC  |
| SCoT36      | GCAACAATGGCTACCACC |
| SCoT37      | CAATGGCTACCACTAGCC |
| SCoT38      | CAATGGCTACCACTAACG |
| SCoT39      | CAATGGCTACCACTAGCG |
| SCoT40      | CAATGGCTACCACTACAG |
| SCoT41      | CAATGGCTACCACTGACA |
| SCoT42      | CAATGGCTACCATTAGCG |
| SCoT44      | CAATGGCTACCATTAGCC |
| SCoT45      | ACAATGGCTACCACTGAC |

**Table S4.** The band information of SCoTs in orchardgrass.

| Primer Pairs<br>Bands | Total Number<br>of Bands | Number of<br>Polymorphic Bands | Percentage of<br>Polymorphic Bands (%) |
|-----------------------|--------------------------|--------------------------------|----------------------------------------|
| SCoT1                 | 14                       | 9                              | 64.29                                  |
| SCoT2                 | 17                       | 17                             | 100.00                                 |
| SCoT5                 | 10                       | 10                             | 100.00                                 |
| SCoT6                 | 10                       | 7                              | 70.00                                  |
| SCoT8                 | 20                       | 20                             | 100.00                                 |
| SCoT10                | 19                       | 17                             | 89.47                                  |
| SCoT14                | 19                       | 18                             | 94.74                                  |
| SCoT16                | 10                       | 10                             | 100.00                                 |
| SCoT25                | 14                       | 14                             | 100.00                                 |
| SCoT26                | 12                       | 9                              | 75.00                                  |
| SCoT27                | 10                       | 9                              | 90.00                                  |
| SCoT34                | 13                       | 13                             | 100.00                                 |
| SCoT35                | 9                        | 8                              | 88.89                                  |
| SCoT36                | 8                        | 8                              | 100.00                                 |
| SCoT37                | 14                       | 14                             | 100.00                                 |
| SCoT38                | 13                       | 13                             | 100.00                                 |
| SCoT39                | 17                       | 16                             | 100.00                                 |
| SCoT40                | 15                       | 15                             | 100.00                                 |
| SCoT41                | 12                       | 12                             | 100.00                                 |
| SCoT42                | 20                       | 20                             | 100.00                                 |
| SCoT44                | 13                       | 13                             | 100.00                                 |
| Total                 | 289                      | 272                            | 94.12                                  |

**Table S5.** The detailed information about accession code, name, origin, and rust resistance score in orchardgrass.

| Accession Code | Accession Name | Origin                                                                                        | Ploidy     | Rust Resistance Score in Different Year |      |
|----------------|----------------|-----------------------------------------------------------------------------------------------|------------|-----------------------------------------|------|
|                |                |                                                                                               |            | 2011                                    | 2012 |
| 1              | 98-102         | United States                                                                                 | Tetraploid | 6                                       | 5    |
| 2              | 1473           | Australia                                                                                     | Tetraploid | 6                                       | 5    |
| 3              | 2122           | Animal Husbandry Research Institute, Hubei, China                                             | Tetraploid | 6                                       | 6    |
| 4              | 947            | Japan                                                                                         | Tetraploid | 6                                       | 5    |
| 5              | 02-114         | Qujing, Yunnan, China                                                                         | Tetraploid | 6                                       | 6    |
| 6              | 02-115         | Deqin, Yunnan, China                                                                          | Tetraploid | 6                                       | 5    |
| 7              | 1436           | Jiangshu, China                                                                               | Tetraploid | 6                                       | 5    |
| 8              | 1824           | Animal Husbandry Research Institute, Chinese Academy of Agricultural Sciences, Beijing, China | Tetraploid | 6                                       | 6    |
| 9              | 1993           | Animal Husbandry Research Institute, Chinese Academy of Agricultural Sciences, Beijing, China | Tetraploid | 6                                       | 5    |
| 10             | PI610830       | Spain                                                                                         | Tetraploid | 6                                       | 6    |
| 11             | PI610822       | Spain                                                                                         | Tetraploid | 6                                       | 6    |
| 12             | PI173693       | Turkey                                                                                        | Tetraploid | 6                                       | 5    |
| 13             | PI237590       | Israel                                                                                        | Tetraploid | 6                                       | 5    |
| 14             | PI578587       | Portugal                                                                                      | Tetraploid | 5                                       | 5    |
| 15             | PI325293       | Russian Federation                                                                            | Tetraploid | 6                                       | 6    |
| 16             | PI312450       | Former Soviet Union                                                                           | Tetraploid | 6                                       | 5    |
| 17             | PI418672       | Italy                                                                                         | Tetraploid | 5                                       | 5    |
| 18             | PI305497       | Poland                                                                                        | Tetraploid | 5                                       | 5    |
| 19             | PI384018       | Poland                                                                                        | Tetraploid | 6                                       | 6    |
| 20             | PI399466       | Finland                                                                                       | Tetraploid | 5                                       | 6    |
| 21             | PI237268       | Finland                                                                                       | Tetraploid | 5                                       | 5    |
| 22             | PI598424       | Bulgaria                                                                                      | Tetraploid | 5                                       | 6    |
| 23             | PI598423       | Ireland                                                                                       | Tetraploid | 6                                       | 5    |
| 24             | PI231613       | Iran                                                                                          | Tetraploid | 5                                       | 5    |
| 25             | PI380812       | Iran                                                                                          | Tetraploid | 5                                       | 5    |
| 26             | PI308794       | India                                                                                         | Tetraploid | 6                                       | 6    |
| 27             | PI269885       | Pakistan                                                                                      | Tetraploid | 6                                       | 5    |
| 28             | PI237586       | Tunisia                                                                                       | Tetraploid | 5                                       | 6    |
| 29             | PI578667       | Egypt                                                                                         | Tetraploid | 6                                       | 5    |
| 30             | PI231727       | Chile                                                                                         | Tetraploid | 5                                       | 5    |
| 31             | PI469234       | Australia                                                                                     | Tetraploid | 6                                       | 5    |
| 32             | 2410           | Xinjiang, China                                                                               | Tetraploid | 1                                       | 1    |
| 33             | 79-118         | Netherlands                                                                                   | Tetraploid | 1                                       | 1    |
| 34             | 2681           | Canada                                                                                        | Tetraploid | 1                                       | 2    |
| 35             | Anba           | Denmark                                                                                       | Tetraploid | 2                                       | 2    |
| 36             | 2106           | Xinjiang, China                                                                               | Tetraploid | 1                                       | 2    |
| 37             | 02-105         | Dazhou, China                                                                                 | Tetraploid | 1                                       | 2    |
| 38             | 02-106         | Baoxing, China                                                                                | Tetraploid | 1                                       | 2    |
| 39             | 90-130         | Maoxian, Sichuan, China                                                                       | Tetraploid | 1                                       | 1    |
| 40             | 1819           | Animal Husbandry Research Institute, Chinese Academy of Agricultural Sciences, Beijing, China | Tetraploid | 1                                       | 1    |
| 41             | Kaimo          | Xinjiang, China                                                                               | Tetraploid | 2                                       | 2    |
| 42             | PI231517       | Morocco                                                                                       | Tetraploid | 1                                       | 2    |
| 43             | PI265567       | France                                                                                        | Tetraploid | 1                                       | 2    |
| 44             | PI277836       | Turkey                                                                                        | Tetraploid | 1                                       | 2    |
| 45             | PI249732       | Greece                                                                                        | Tetraploid | 2                                       | 1    |
| 46             | PI231535       | Portugal                                                                                      | Tetraploid | 2                                       | 1    |
| 47             | PI632497       | Tunisia                                                                                       | Tetraploid | 1                                       | 2    |
| 48             | PI287804       | Spain                                                                                         | Tetraploid | 1                                       | 1    |
| 49             | PI302892       | Spain                                                                                         | Tetraploid | 1                                       | 2    |
| 50             | PI292587       | Israel                                                                                        | Tetraploid | 1                                       | 1    |
| 51             | PI235281       | France                                                                                        | Tetraploid | 2                                       | 1    |
| 52             | PI578591       | Portugal                                                                                      | Tetraploid | 1                                       | 1    |

Table S5. Cont.

| Accession Code | Accession Name | Origin                | Ploidy     | Rust Resistance Score in Different Year |      |
|----------------|----------------|-----------------------|------------|-----------------------------------------|------|
|                |                |                       |            | 2011                                    | 2012 |
| 53             | PI111536       | Russian Federation    | Tetraploid | 2                                       | 2    |
| 54             | PI345603       | Former Soviet Union   | Tetraploid | 1                                       | 2    |
| 55             | PI311042       | Romania               | Tetraploid | 1                                       | 1    |
| 56             | PI250960       | Serbia and Montenegro | Tetraploid | 2                                       | 2    |
| 57             | PI231469       | Greece                | Tetraploid | 1                                       | 1    |
| 58             | PI288997       | Libya                 | Tetraploid | 2                                       | 2    |
| 59             | PI289003       | Hungary               | Tetraploid | 2                                       | 2    |
| 60             | PI418667       | Belgium               | Tetraploid | 2                                       | 2    |
| 61             | PI237175       | Netherlands           | Tetraploid | 2                                       | 1    |
| 62             | PI196419       | Denmark               | Tetraploid | 2                                       | 2    |
| 63             | PI634311       | Ireland               | Tetraploid | 2                                       | 2    |
| 64             | PI273738       | Argentina             | Tetraploid | 2                                       | 2    |
| 65             | PI250928       | Iran                  | Tetraploid | 1                                       | 2    |
| 66             | PI237585       | India                 | Tetraploid | 2                                       | 1    |
| 67             | PI419517       | Japan                 | Tetraploid | 2                                       | 1    |
| 68             | PI595173       | Xinjiang, China       | Tetraploid | 2                                       | 1    |
| 69             | PI632580       | Afghanistan           | Tetraploid | 2                                       | 2    |
| 70             | PI231480       | Algeria               | Tetraploid | 2                                       | 2    |
| 71             | PI578557       | United states         | Tetraploid | 2                                       | 1    |
| 72             | PI578661       | Colombia              | Tetraploid | 2                                       | 1    |
| 73             | PI285099       | Australia             | Tetraploid | 2                                       | 2    |
| 74             | PI578634       | Morocco               | Tetraploid | 2                                       | 1    |
| 75             | PI578635       | Morocco               | Tetraploid | 1                                       | 1    |
